# Supplementary material for: Gut Microbiota and Serum Metabolome in Elite Cross-Country Skiers: A Controlled Study
Source: MDPI journal article supplement (doi:10.3390/metabo12040335), 2022-04-07
Supplement: s1 [file s1]

# SUPPLEMENTS

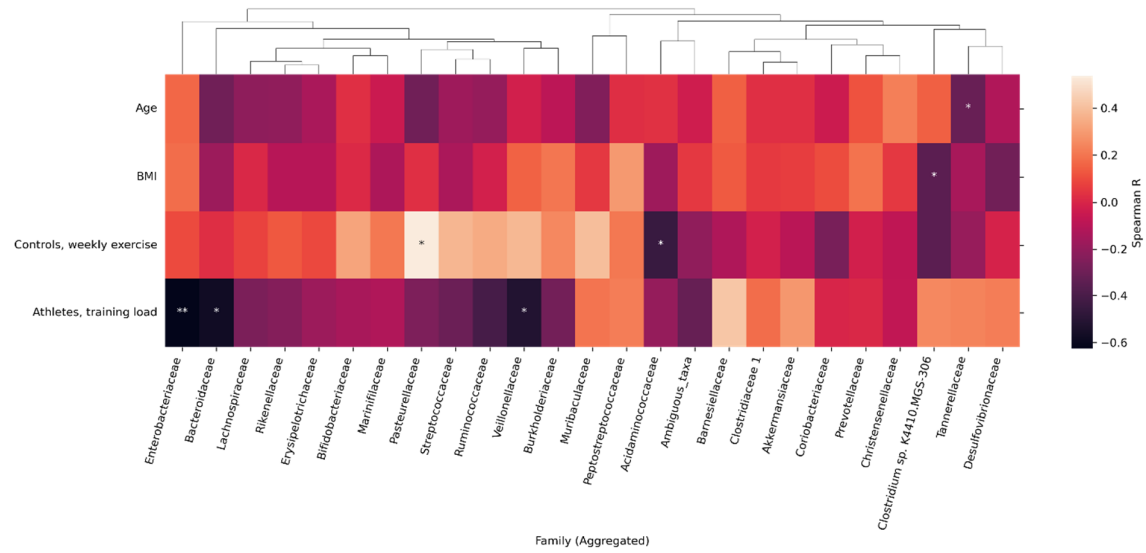

**Figure S1.** Clustered heatmap of Spearman correlation coefficients. between the bacterial families and background variables. Spearman  $p$ -value \* < 0.05 \*\* < 0.01.

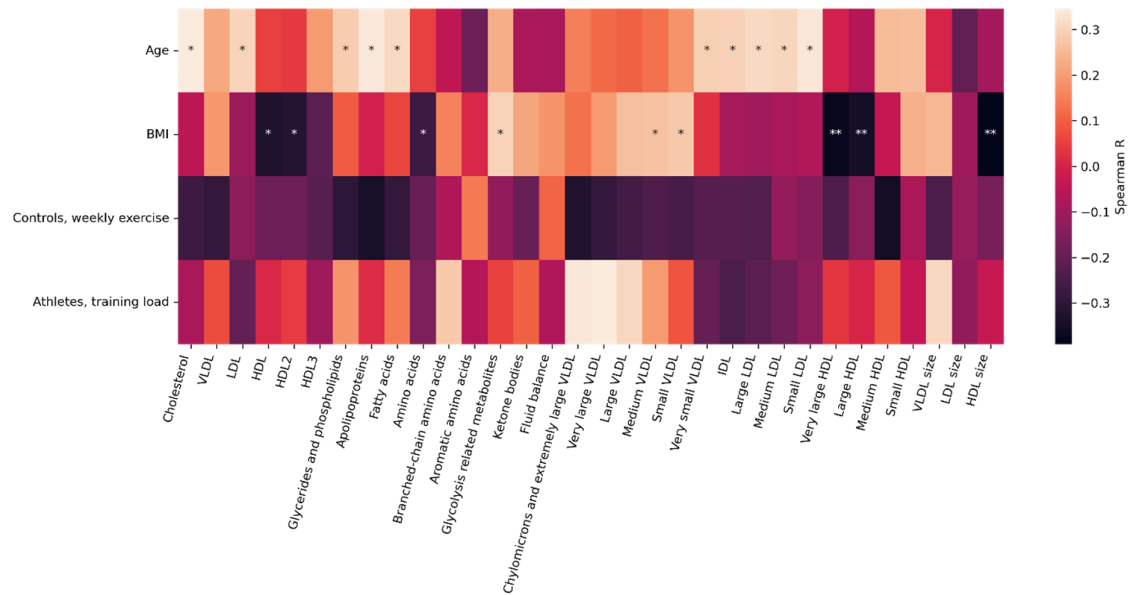

**Figure S2.** Heatmap of Spearman correlation coefficients between the metabolite groups and back-ground variables. Spearman  $p$ -value \* < 0.05 \*\* < 0.01.

### Amino acids

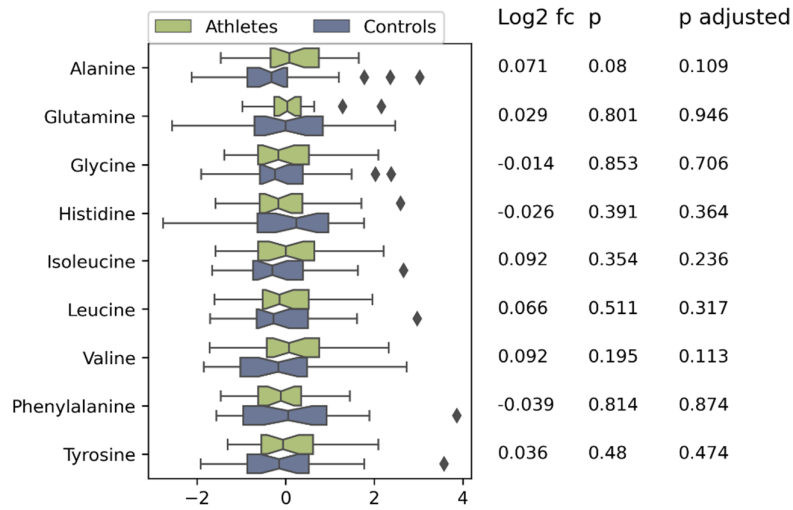

### Apolipoproteins

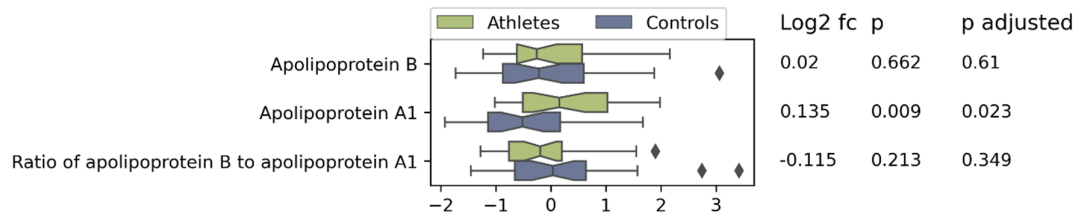

### Cholesterol

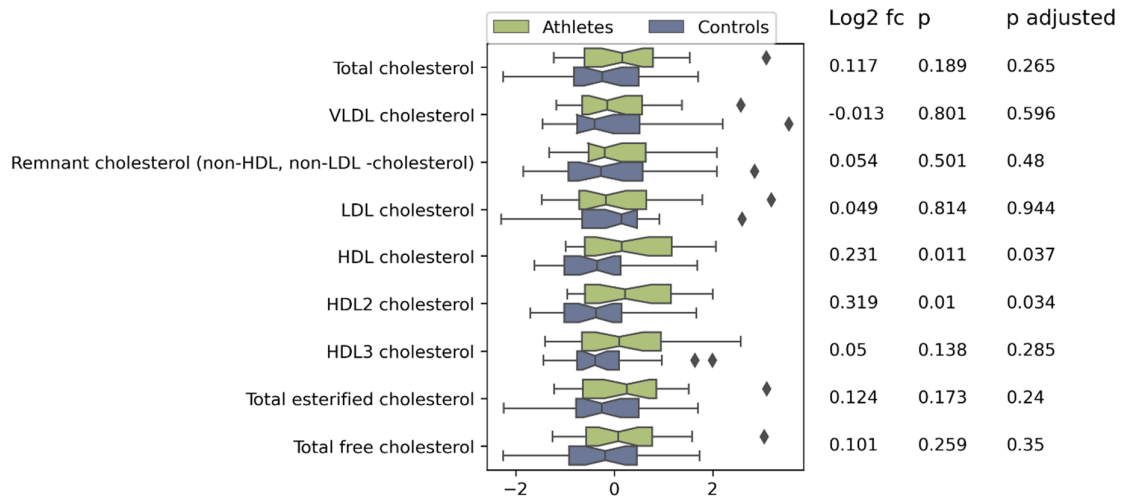

## Fatty acids

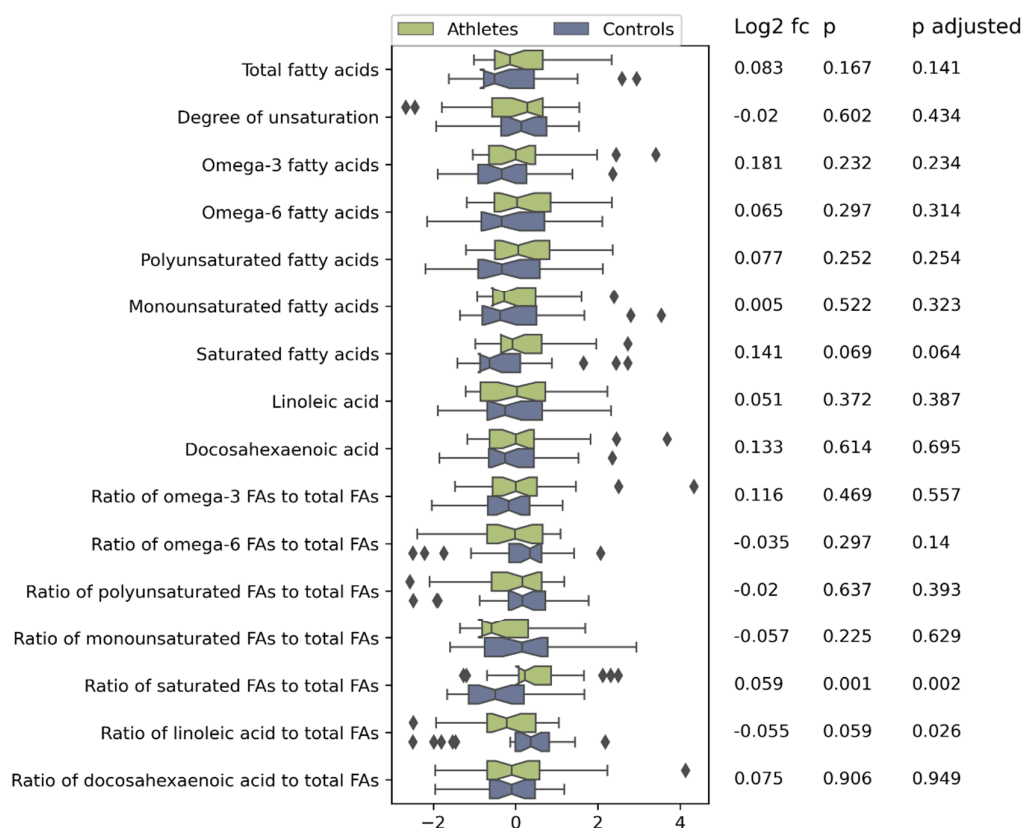

## Fluid balance

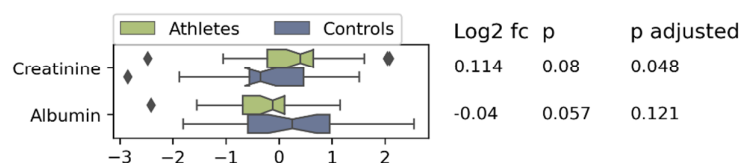

## Glycerides and phospholipids

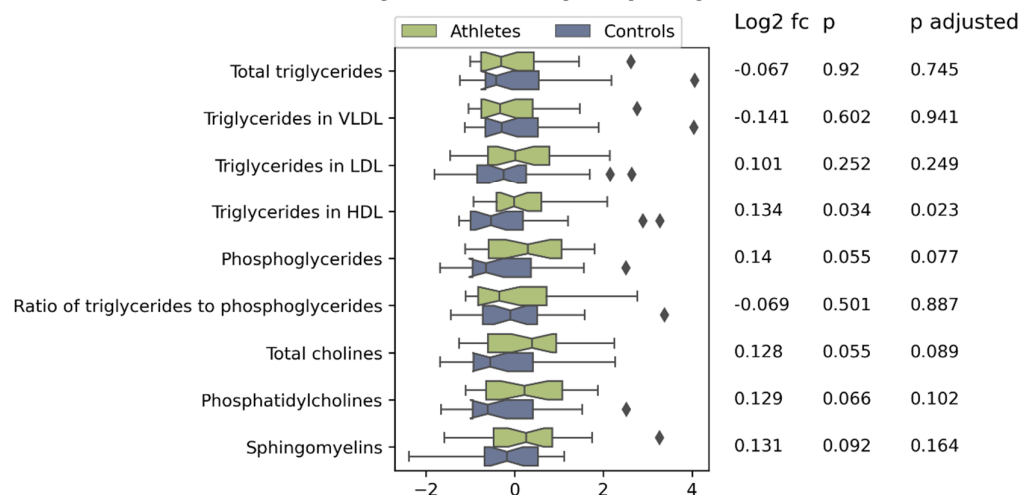

### Glycolysis related metabolites

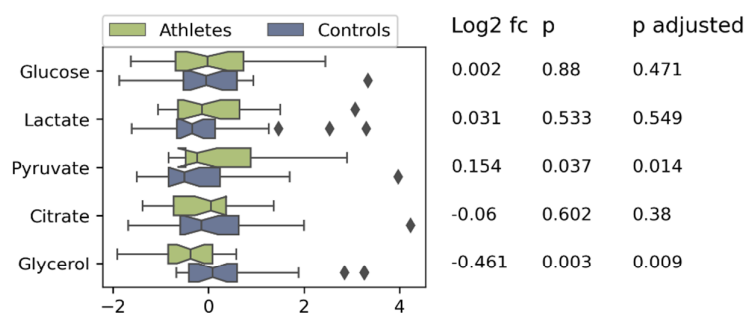

### Ketone bodies

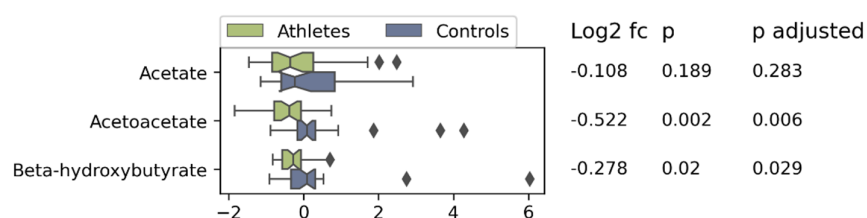

### Lipoprotein particle sizes

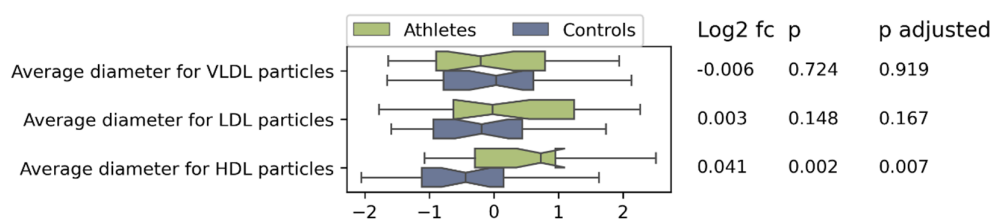

**Figure S3.** The metabolites and derived parameters. For boxplots, all values were mean centered. Whiskers indicate 1.5 times the interquartile range. Fold change between skiers and controls log2-transformed. *p*-values derived from Kruskal Wallis test. Adjusted *p*-values derived from Quade's ANCOVA adjusted for BMI and age.

**Table S1.** Results summary for linear regression model using *Butyricicoccus* and *Ruminococcus torques* group as dependent variables and associated metabolites as regressors.

| Dep. Variable:      | Butyricicoccus               |                              |        |       |
|---------------------|------------------------------|------------------------------|--------|-------|
| F-statistic:        | 82.88                        | R-squared (uncentered):      | 0.864  |       |
| Prob (F-statistic): | 5.68E-17                     | Adj. R-squared (uncentered): | 0.854  |       |
|                     | Coefficient                  | Std error                    | t      | P> t  |
| HDL2 cholesterol    | 0.767                        | 0.509                        | 1.507  | 0.14  |
| HDL size            | 0.2151                       | 0.066                        | 3.26   | 0.002 |
| Acetoacetate        | -18.6707                     | 7.912                        | -2.36  | 0.023 |
| Dep. Variable:      | [Ruminococcus] torques group |                              |        |       |
| F-statistic:        | 103.7                        | R-squared (uncentered):      | 0.838  |       |
| Prob (F-statistic): | 1.49E-16                     | Adj. R-squared (uncentered): | 0.83   |       |
|                     | Coefficient                  | Std error                    | t      | P> t  |
| Acetate             | -13.756                      | 11.906                       | -1.155 | 0.255 |
| Total cholesterol   | 0.7533                       | 0.116                        | 6.499  | 0     |

Method: Ordinary least squares. R<sup>2</sup> is computed without centering (uncentered) since the model does not contain a constant. Standard Errors assume that the covariance matrix of the errors is correctly specified.
